# Supplementary material
Source: Springer Nature journal article supplement (https://www.springermedizin.de/resource/supplementary/12933_2009_211_MOESM1_ESM.pdf/9539864)
Supplement: MOESM1 [file 9539864]

Patients enrolled in the Diabetes Registry (1995-2005)

n=7,920

Exclusion:

(1) Computerized drug data only available after 1996, n=582;

(2) Patients of non-Chinese ethnicity and/or age <30 years at baseline, n=291:

- non-Chinese, n=51; and/or

- age <30 years, n=252

(3) Other diseases, n=593:

- type 1 diabetes, n=191;

- known malignancy or other terminal illnesses, n=166;

- history of hemorrhagic stroke, n=21;

- upper gastro-intestinal bleeding, n=156;

- alcoholism, n=8;

- oesophageal bleeding, n=20;

- Mallory Weiss syndrome, n=10;

- Liver cirrhosis, n=86; and/or

- Coagulopathy, n=1

6,454 patients entered into final analysis

Primary prevention cohort

n=5,731

Secondary prevention cohort

n=723
